# Supplementary material for: Costunolide alleviates atherosclerosis in high-fat diet-fed ApoE−/− mice through covalently binding to IKKβ and inhibiting NF-κB-mediated inflammation
Source: Springer Nature journal article supplement (doi:10.1038/s41401-022-00928-0), 2022-06-16

Figure.4C

Repeat 1

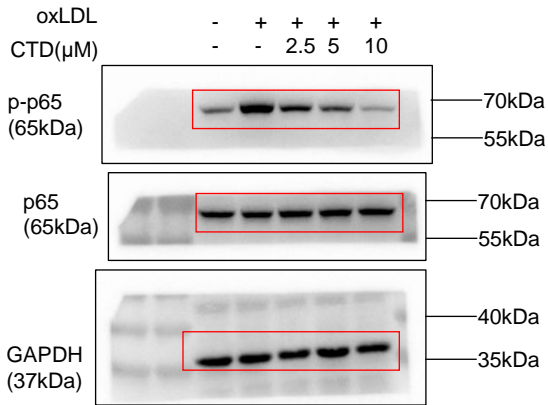

Repeat 2

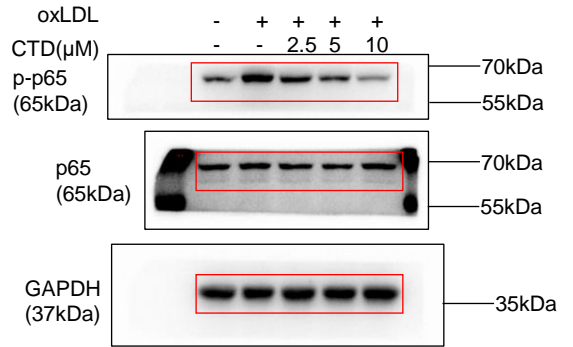

Repeat 3

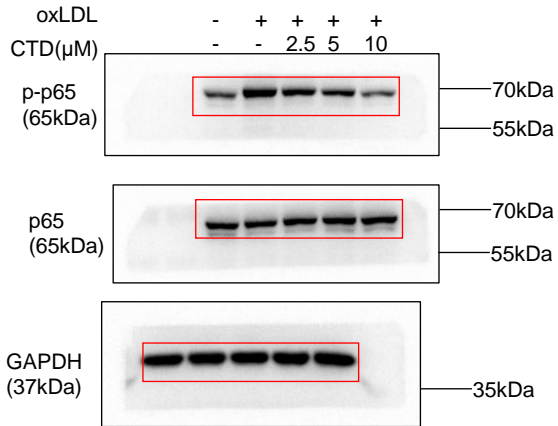

Repeat 4

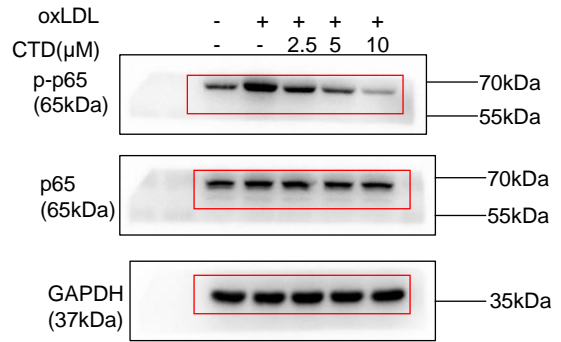

Repeat 5

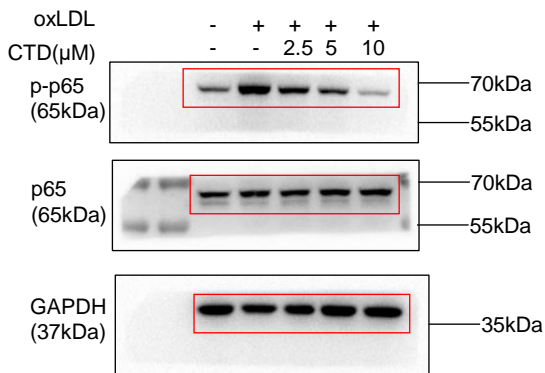

Repeat 6

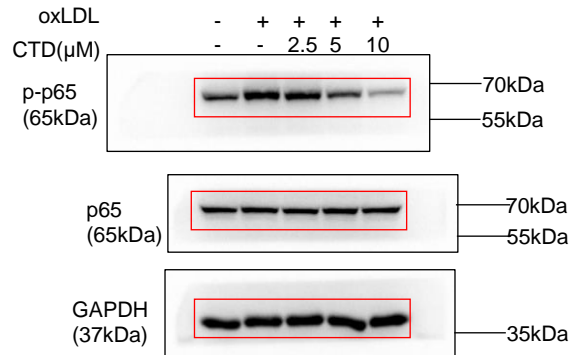

Figure.4F

Repeat 1

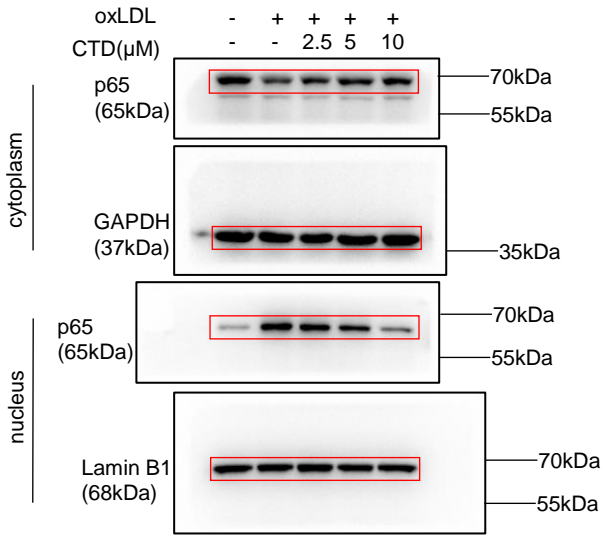

Repeat 2

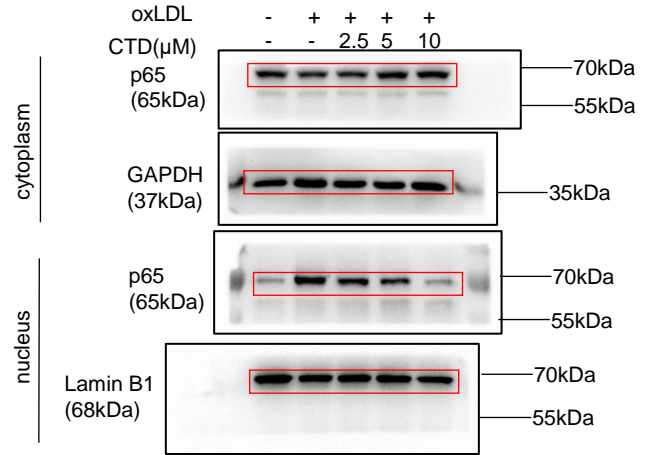

Repeat 4

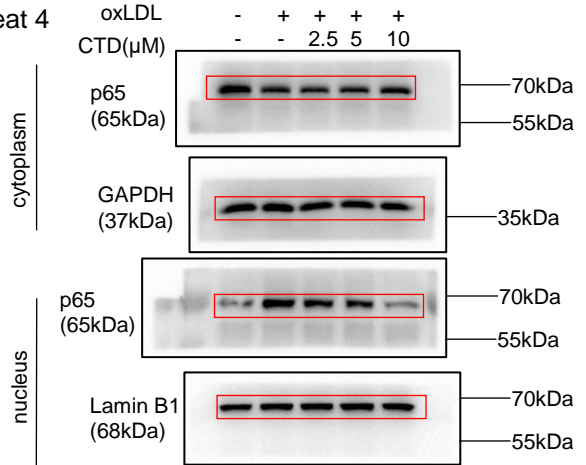

Repeat 3

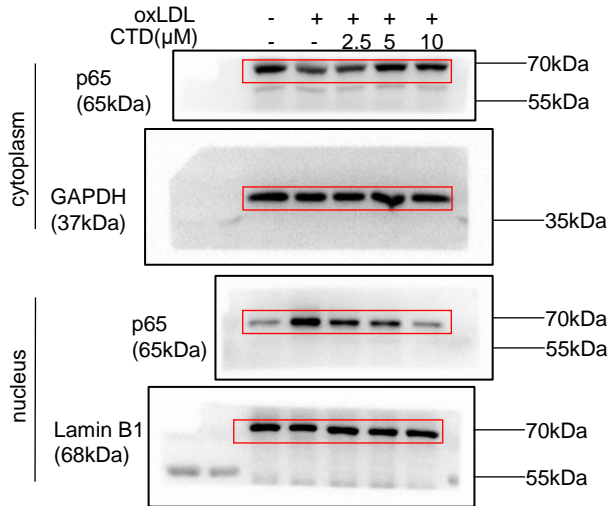

Repeat 5

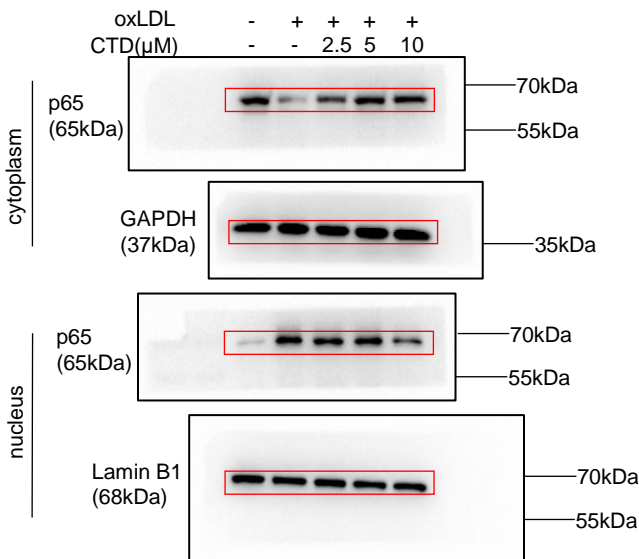

Repeat 6

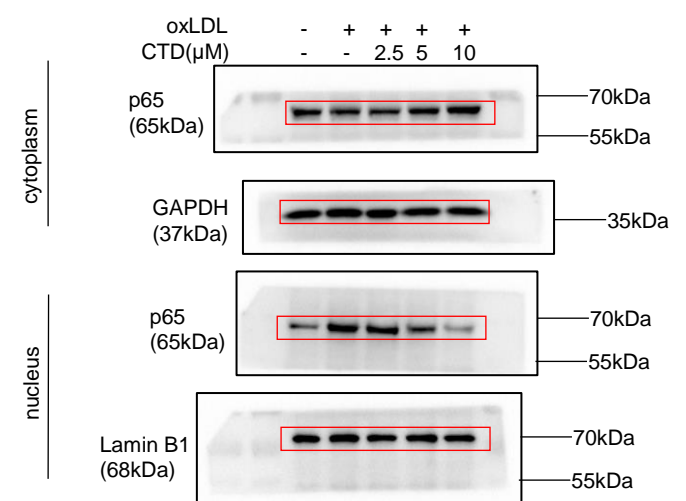

**Figure.5A**

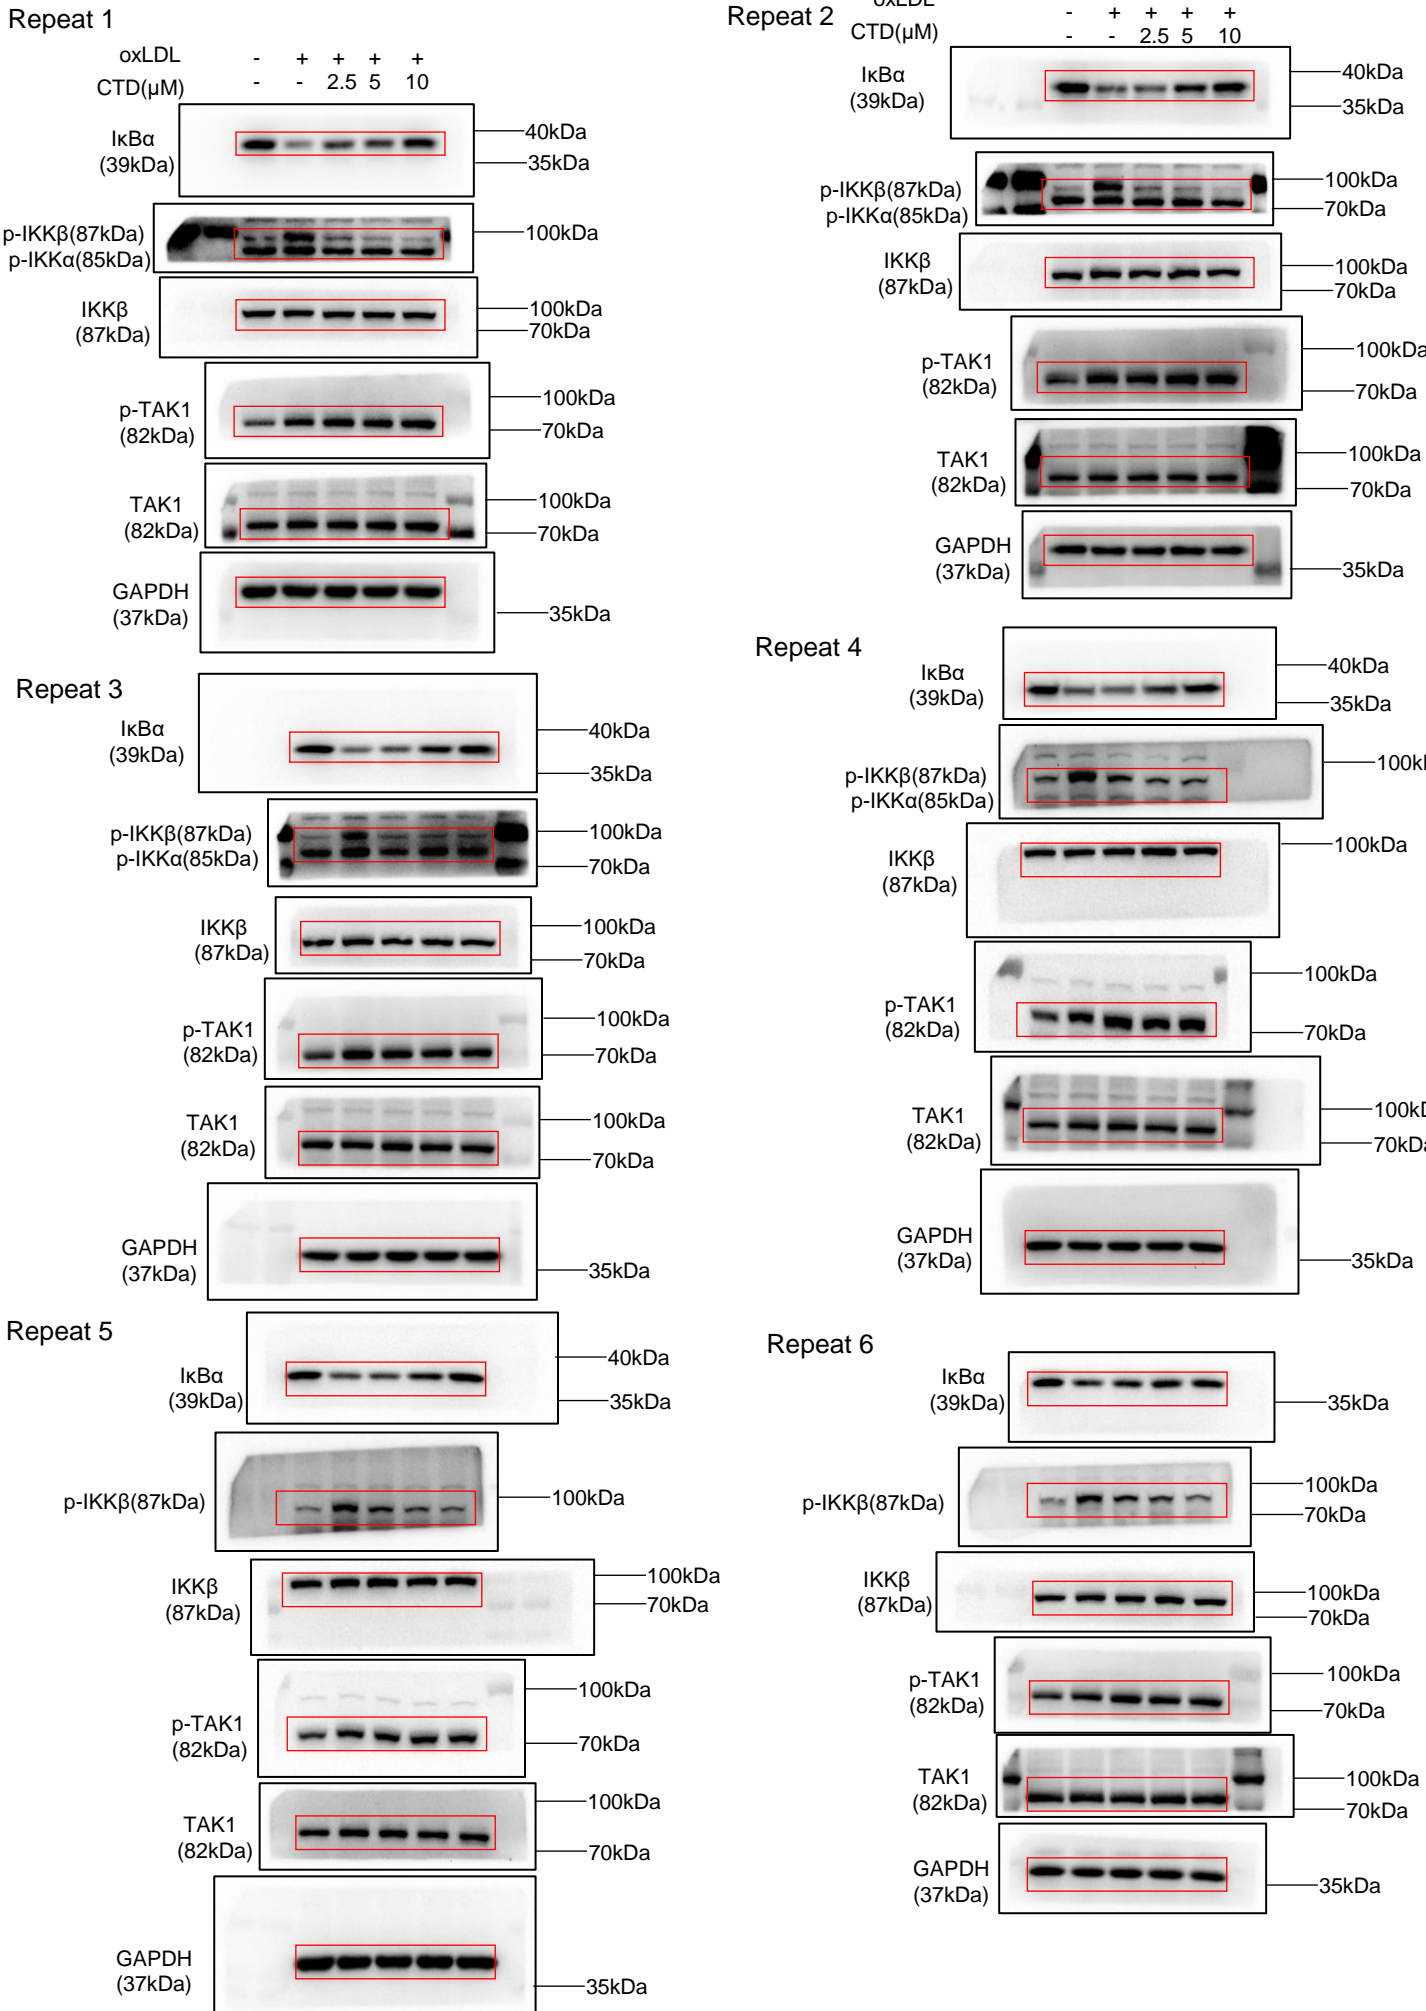

Figure.5C

Repeat 1

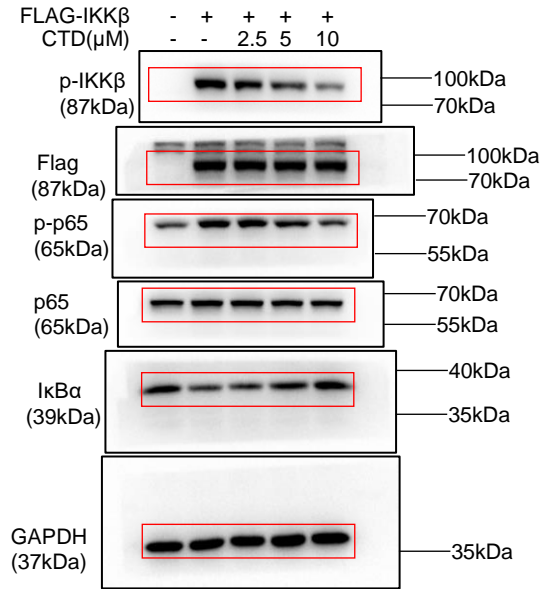

Repeat 2

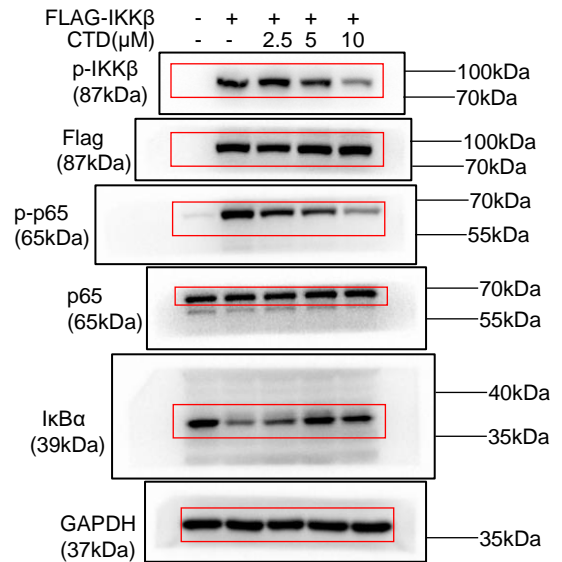

Repeat 3

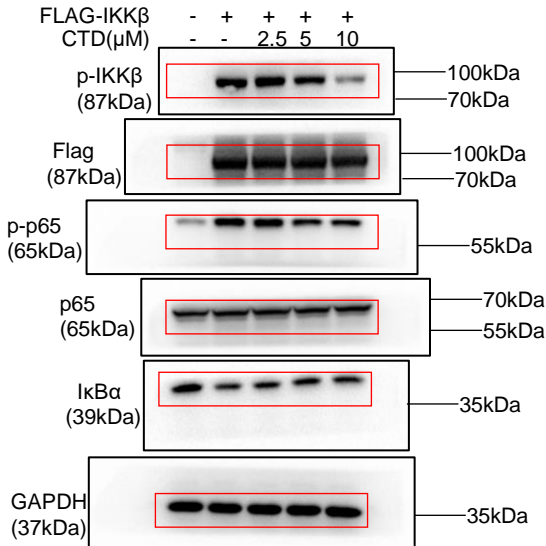

Repeat 4

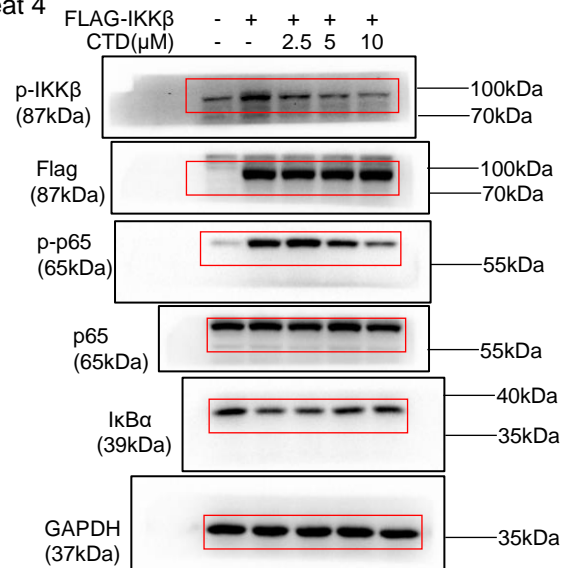

Repeat 5

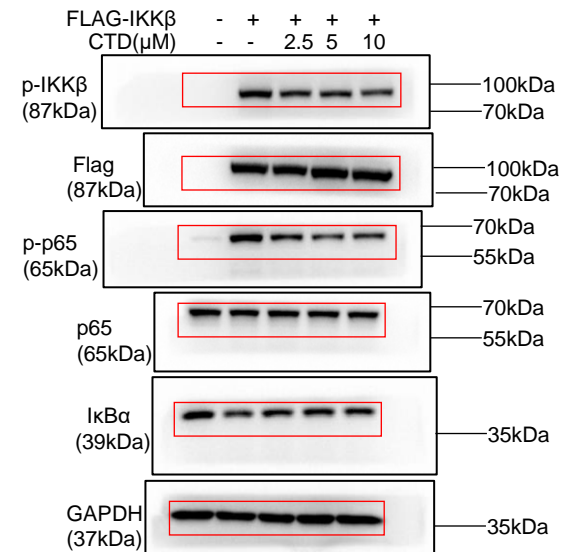

Repeat 6

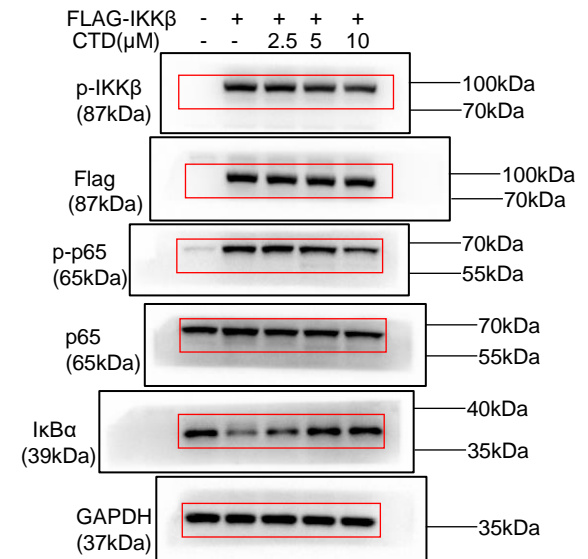

# Figure.5D

## Repeat 1

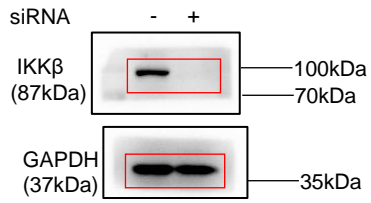

## Repeat 2

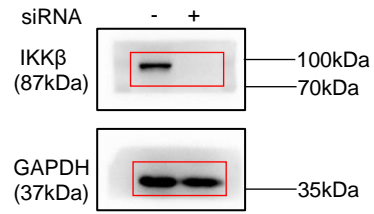

## Repeat 3

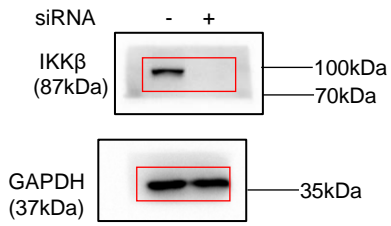

## Repeat 4

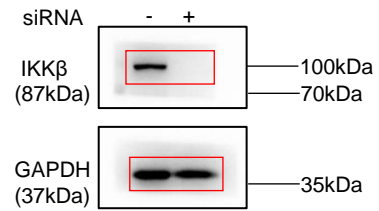

## Repeat 5

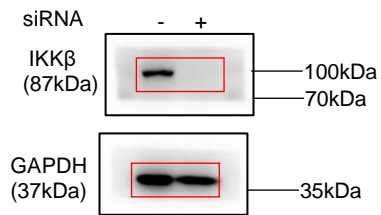

# Figure.5H

Repeat 1

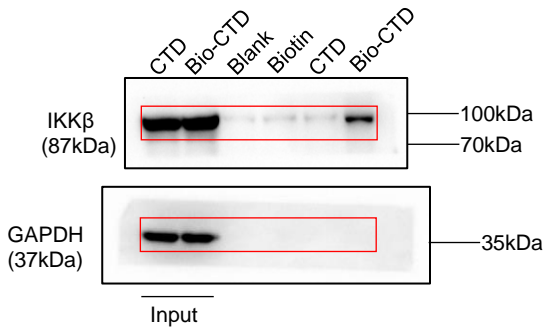

Repeat 2

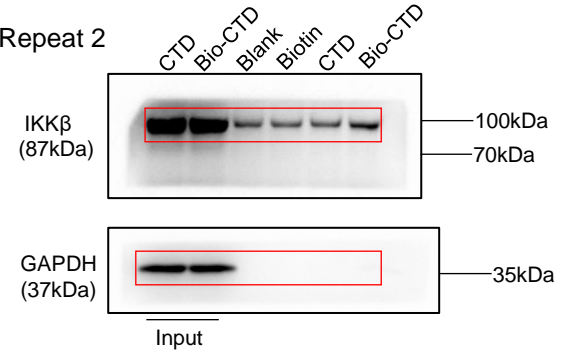

Repeat 3

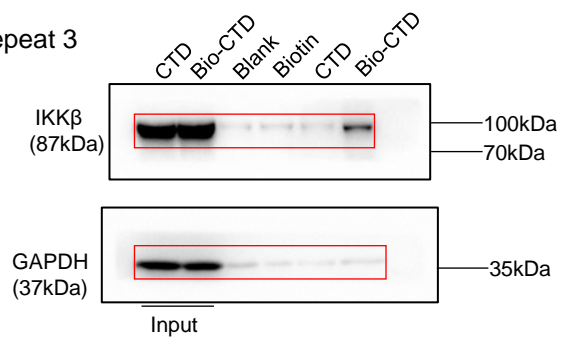

# Figure.5I

Repeat 1

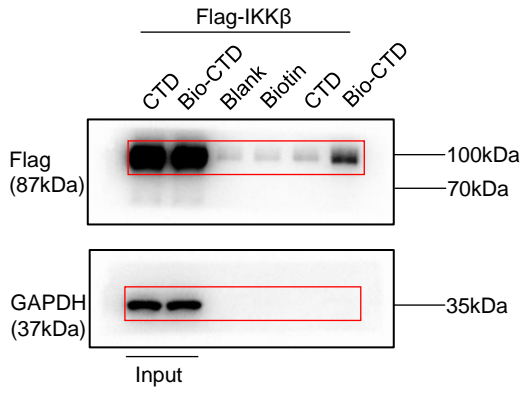

Repeat 2

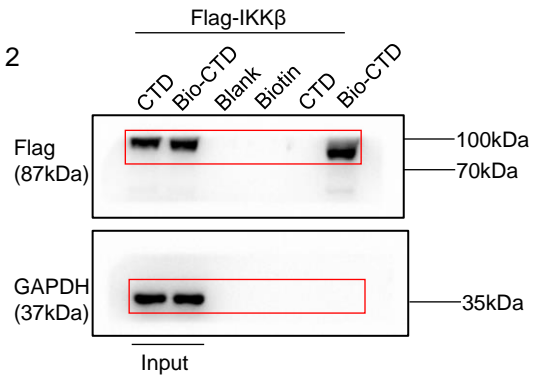

Repeat 3

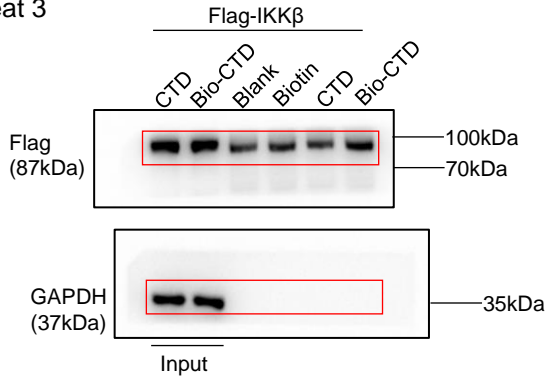

# Figure.5J

Repeat 1

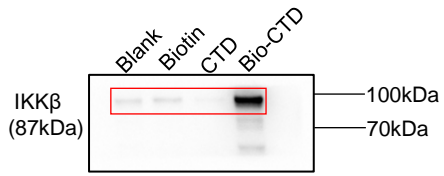

Repeat 2

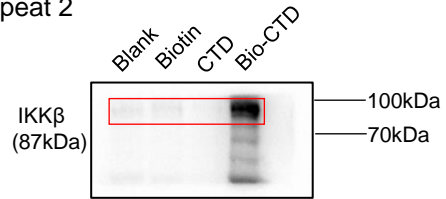

Repeat 3

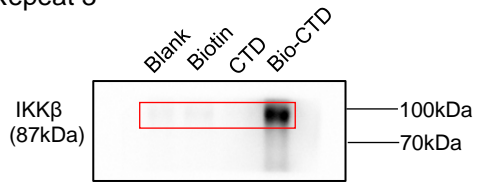



Figure.6D

Repeat 1

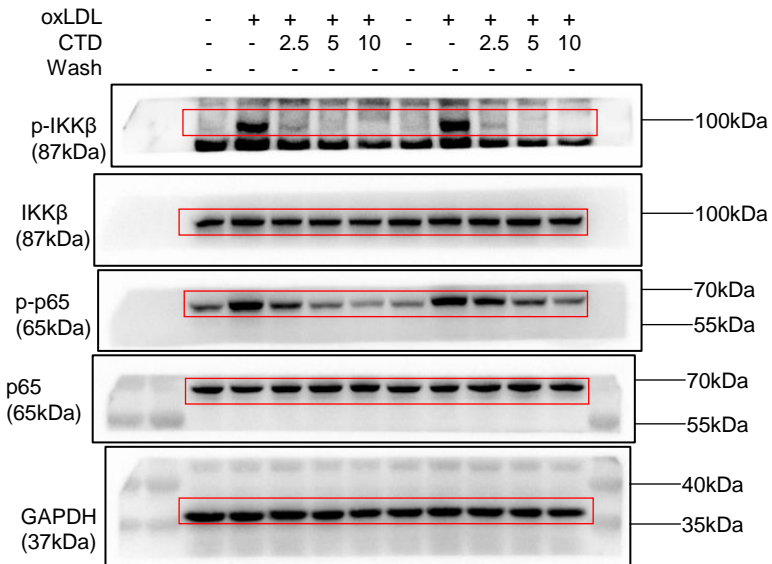

Repeat 2

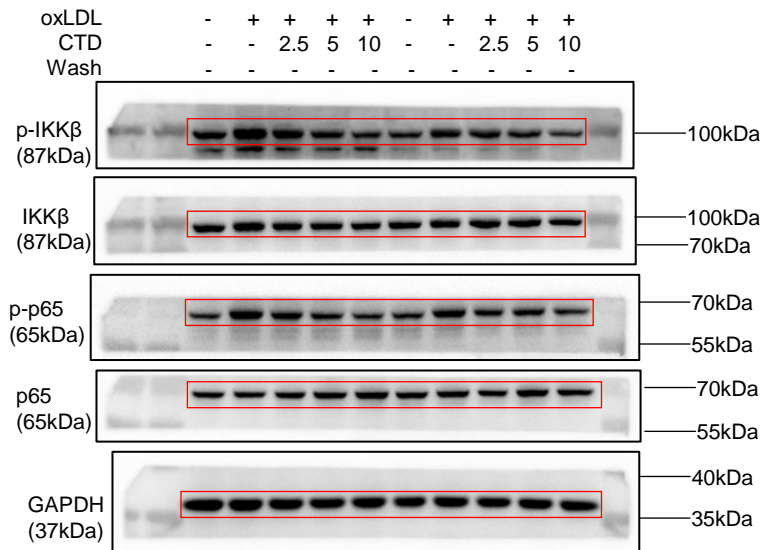

Figure.6D

Repeat 3

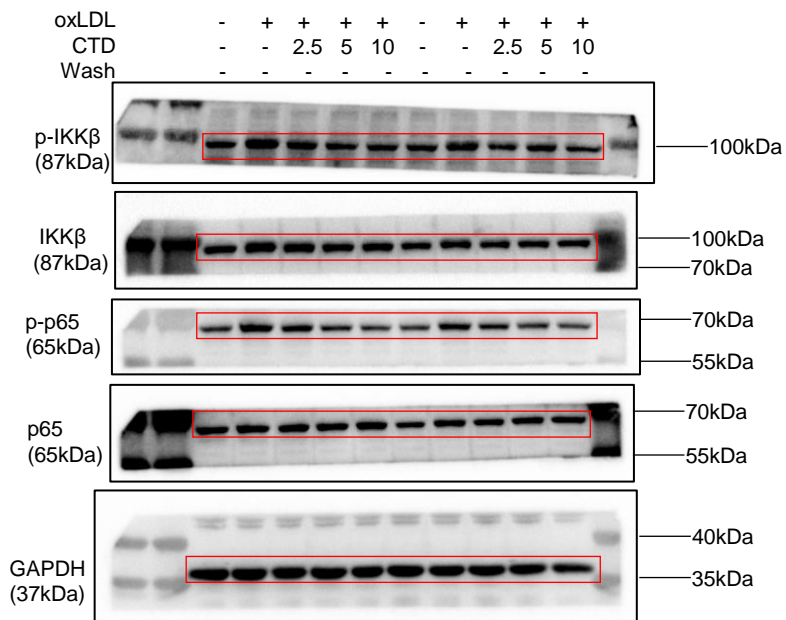

Figure.7A

Repeat 1

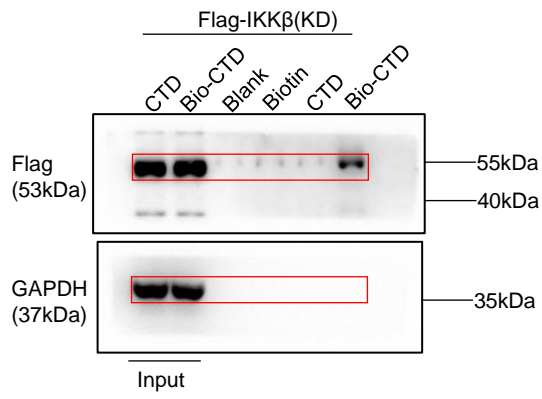

Repeat 2

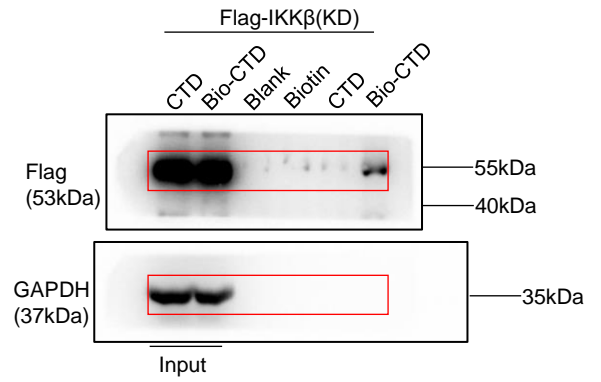

Repeat 3

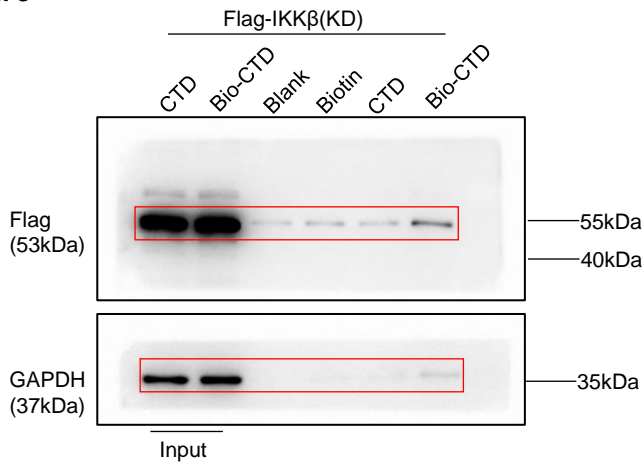

Figure.7B

Repeat 1

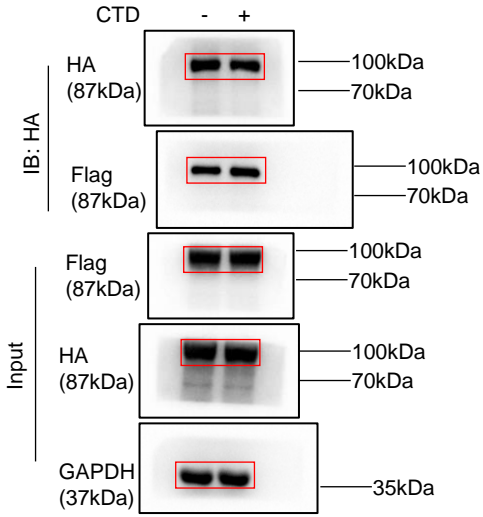

Repeat 2

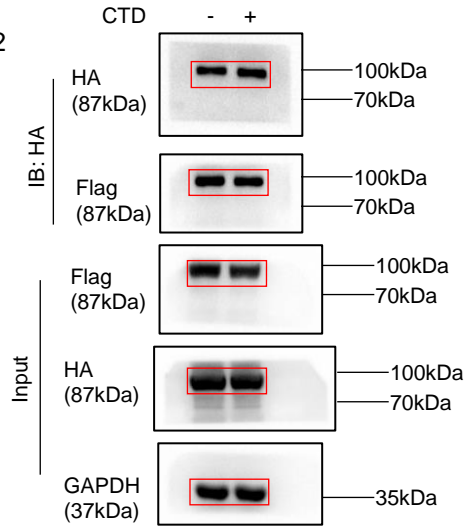

Repeat 3

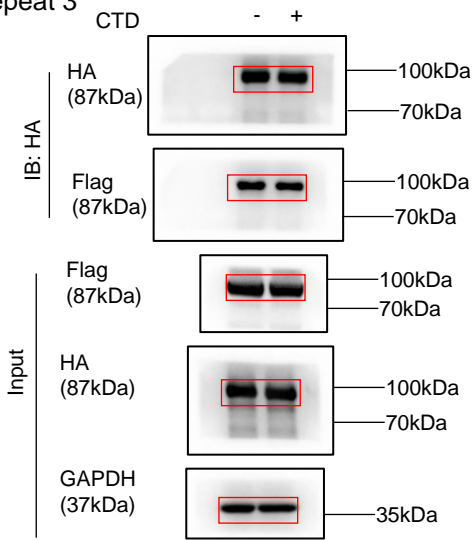

Figure.7E

Repeat 1

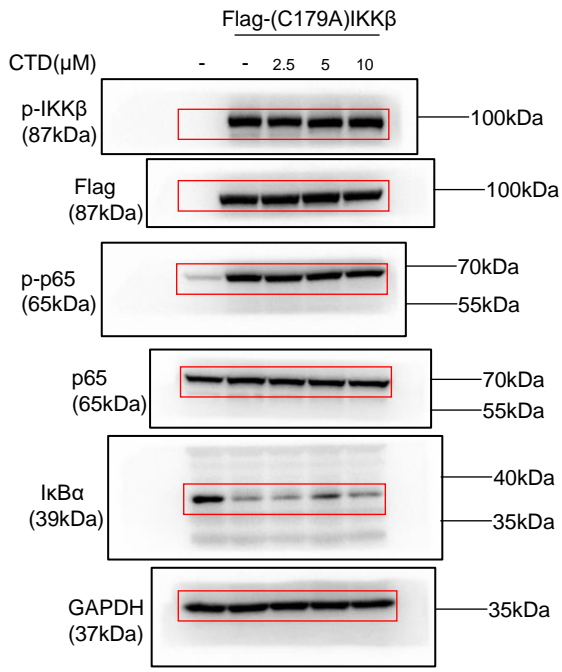

Repeat 2

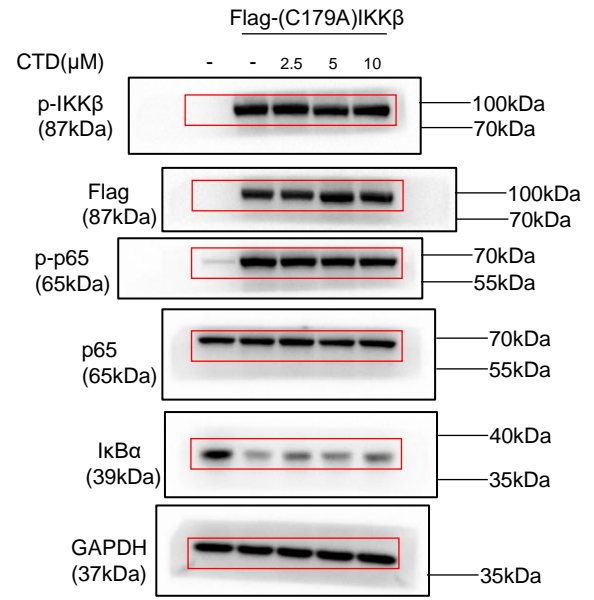

Repeat 3

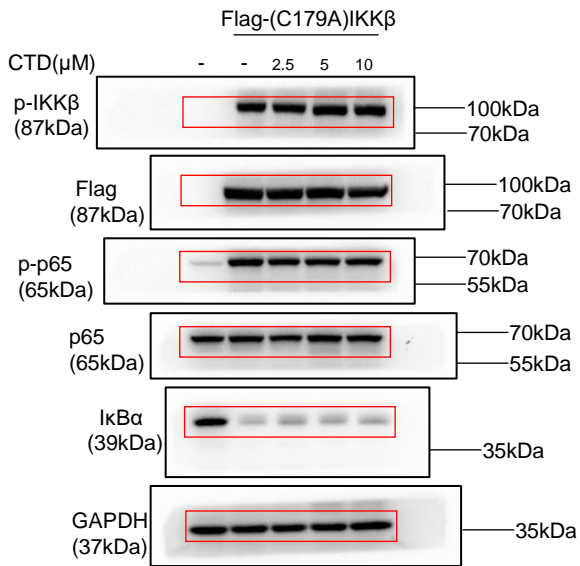

Figure.7F

Repeat 1

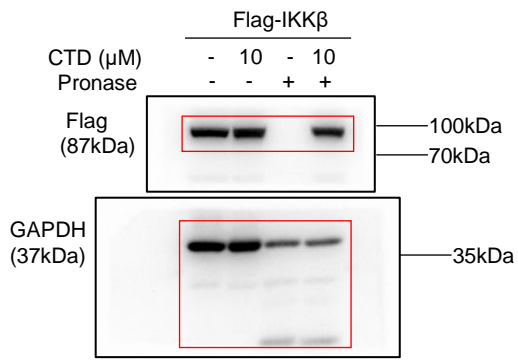

Repeat 2

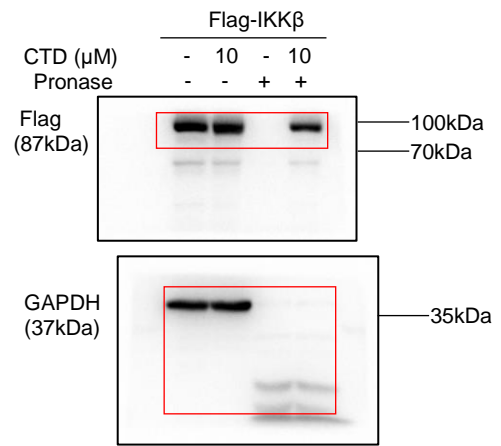

Repeat 3

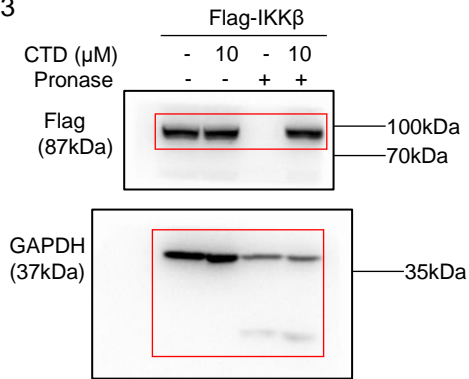

Figure.7G

Repeat 1

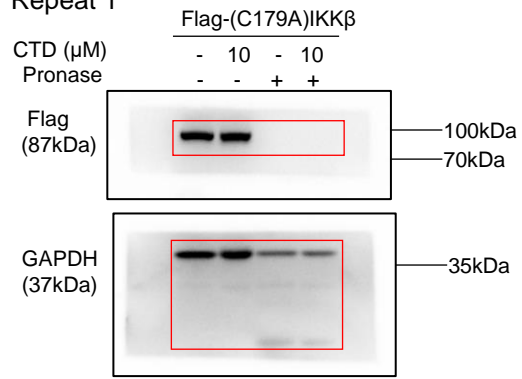

Repeat 2

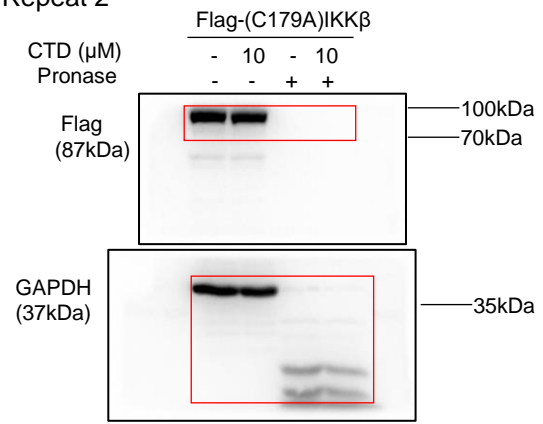

Repeat 3

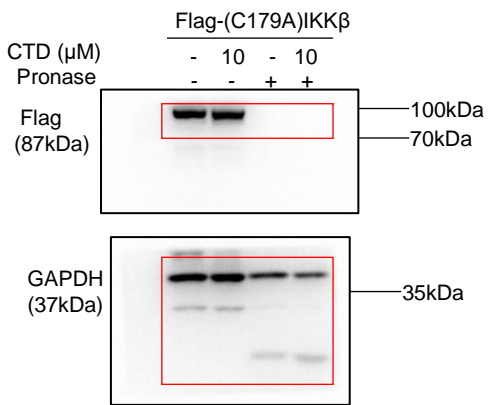

# Figure.7H

Repeat 1

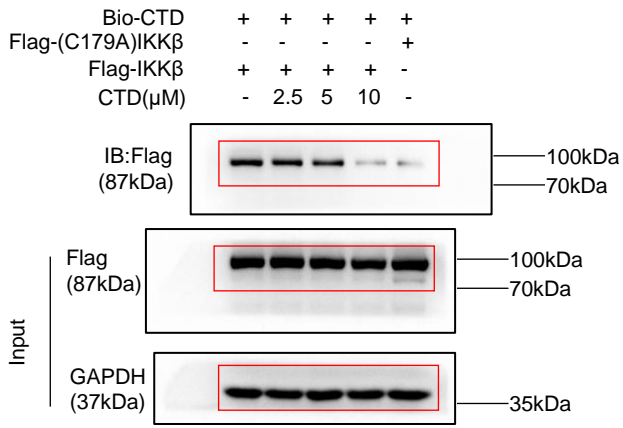

Repeat 2

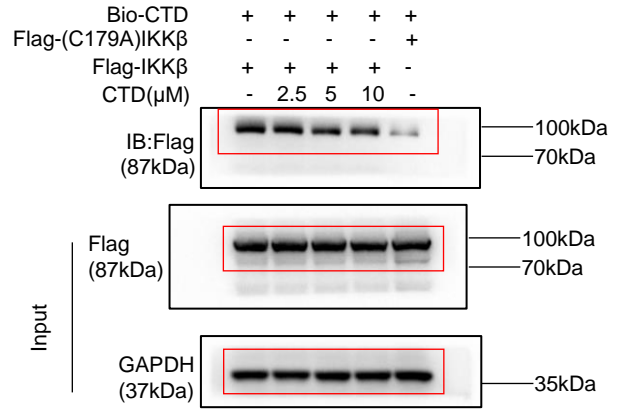

Repeat 3

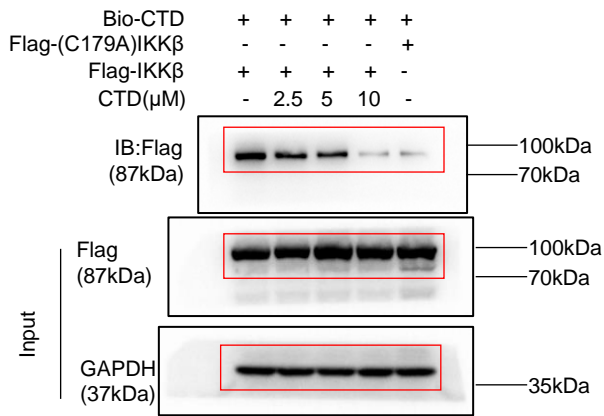



Figure.71

Repeat 1

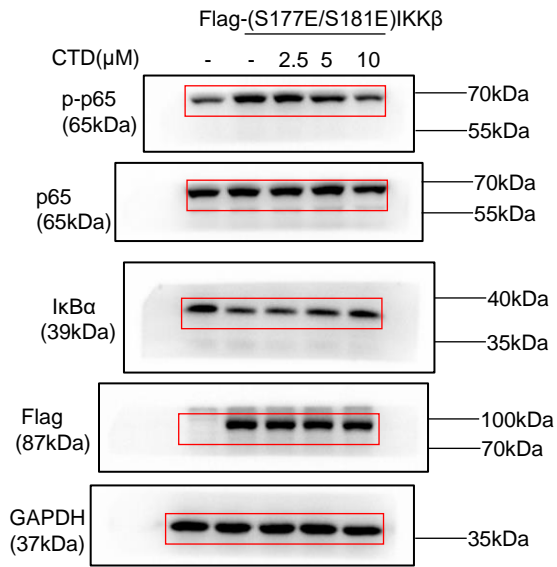

Repeat 2

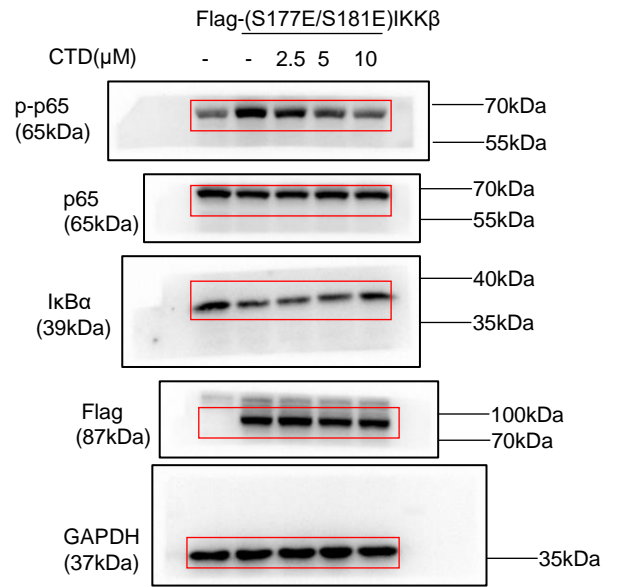

Repeat 3

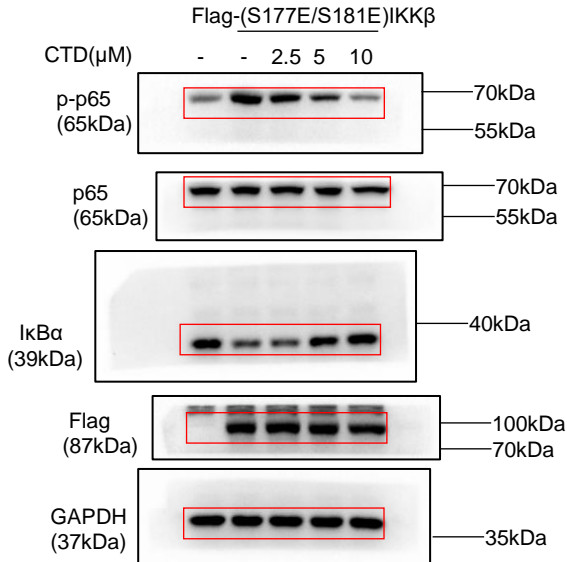

# Supplementary Figure.2C

## Repeat 1

## Repeat 2

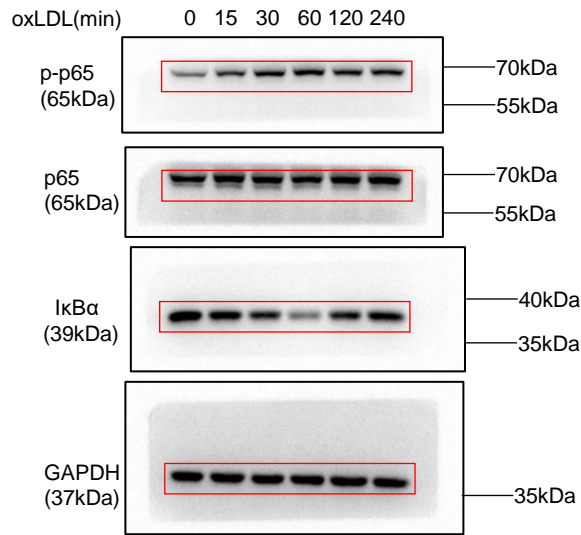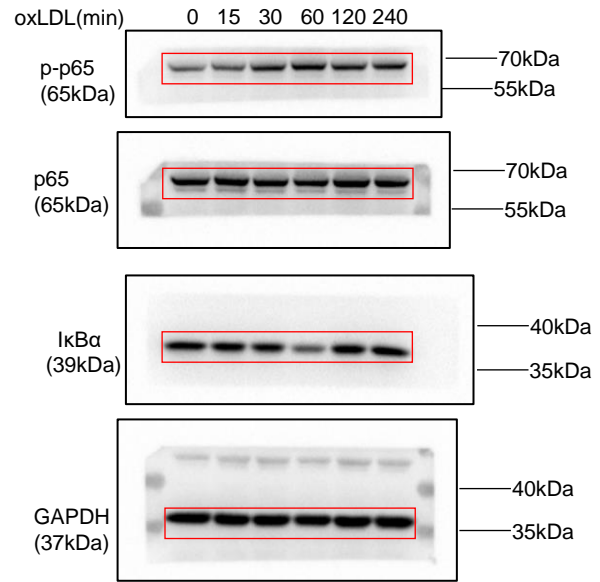

## Repeat 3

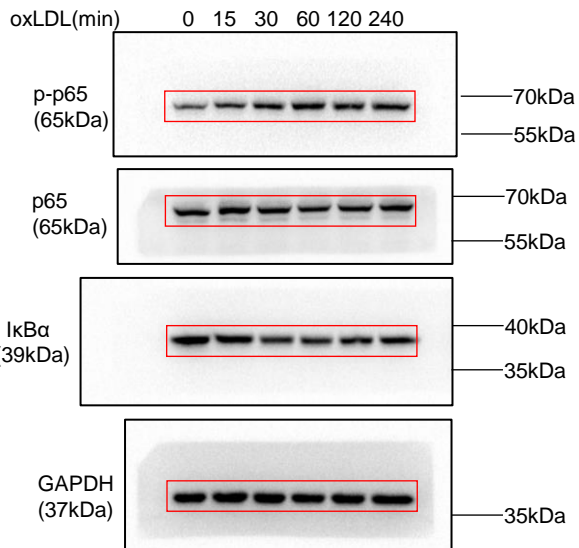

Supplement: 41401_2022_928_MOESM2_ESM.pdf [file 41401_2022_928_MOESM2_ESM.pdf]
