# Supplementary material for: Costunolide alleviates atherosclerosis in high-fat diet-fed ApoE−/− mice through covalently binding to IKKβ and inhibiting NF-κB-mediated inflammation
Source: Springer Nature journal article supplement (doi:10.1038/s41401-022-00928-0), 2022-06-16
Supplement: 41401_2022_928_MOESM1_ESM.pdf [file 41401_2022_928_MOESM1_ESM.pdf]

## ENGLISH EDITING CERTIFICATE

This document certifies that the manuscript listed below was edited for proper English language, grammar, punctuation, spelling, and overall style by one or more of the highly qualified native English speaking editors at Wiley Editing Services

### Manuscript title

Costunolide alleviates atherosclerosis in high-fat diet-fed ApoE<sup>-/-</sup> mice by covalently binding to IKK $\beta$  and inhibiting NF- $\kappa$ B-mediated inflammation

### Authors

Zhuqi Huang et al.

### Order No

ZUHWZ\_1

### Date Issued

May 24, 2022

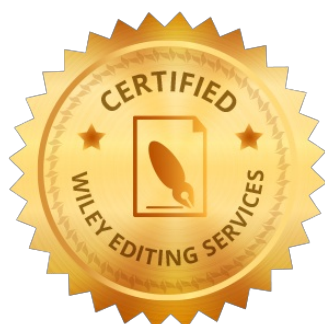

This document certifies that the manuscript listed above was edited for proper English language, grammar, punctuation, spelling, and overall style. Neither the research content nor the authors' intentions were altered in any way during the editing process. Documents receiving this certification should be English-ready for publication; however, the author has the ability to accept or reject our suggestions and changes. If you have any questions or concerns about this document or certification, please contact [help-cn@wileyeditingservices.com](mailto:help-cn@wileyeditingservices.com).
